# Supplementary material for: Development of an In Vivo Sensor to Monitor the Effects of Vapour Pressure Deficit (VPD) Changes to Improve Water Productivity in Agriculture
Source: MDPI journal article supplement (doi:10.3390/s19214667), 2019-10-28
Supplement: s1 [file s1]

Supplementary file

# Development of an in vivo sensor to monitor the effects of Vapour Pressure Deficit (VPD) changes to improve water productivity in agriculture.

Filippo Vurro<sup>1</sup>, Michela Janni<sup>\*1,2</sup>, Nicola Coppedè<sup>1</sup>, Francesco Gentile<sup>3</sup>, Riccardo Manfredi<sup>1</sup>,  
Manuele Bettelli<sup>1</sup> and Andrea Zappettini<sup>1</sup>

<sup>1</sup>IMEM-CNR Parco Area delle Scienze 37/A-43124 Parma

<sup>2</sup>IBBR-CNR Via Amendola 165/A 70126 Bari

<sup>3</sup>Department of Electrical Engineering and Information Technology, University Federico II, Naples, Italy

\* Correspondence: [ichela.janni@imem.cnr.it](mailto:ichela.janni@imem.cnr.it)

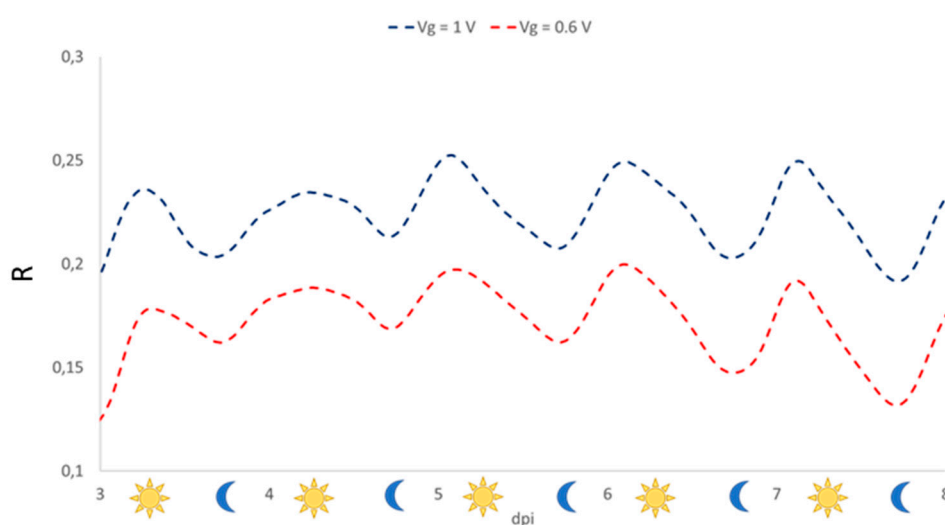

**Figure S1.** Day and night modulation of the bioristor response R at different gate voltage (blu: 1V, red 0,6 V).

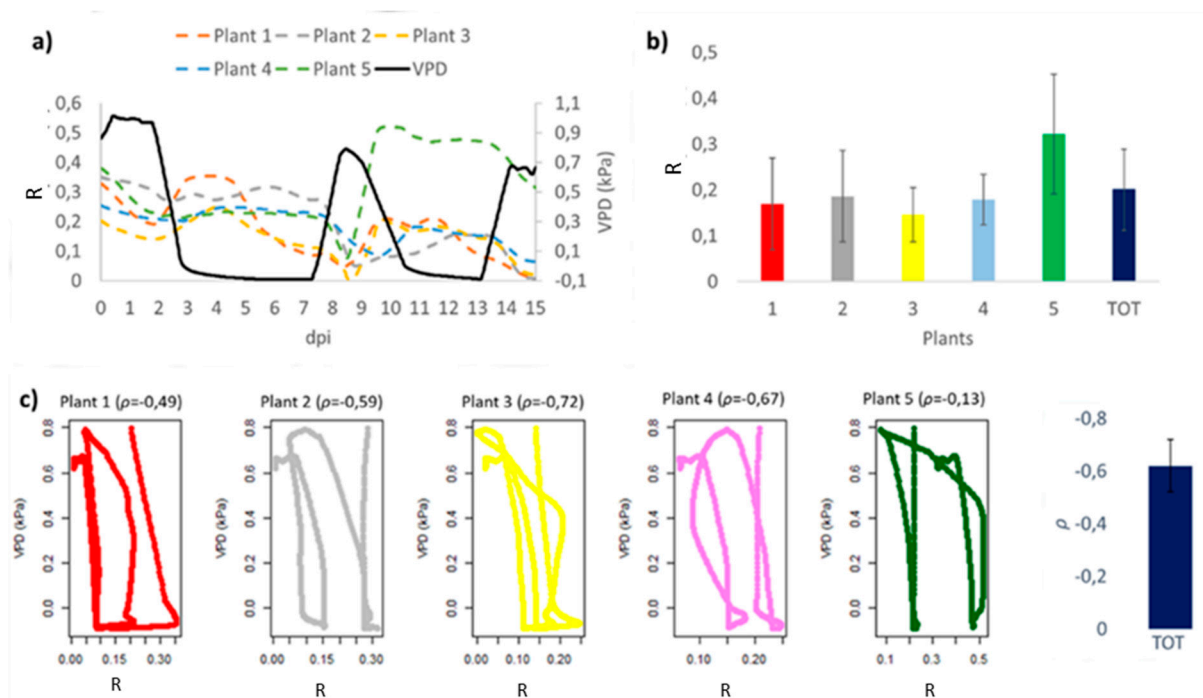

**Figure S2:** (a) Plot showing the average of the individual plant R measured at  $V_g=1$  (Plant 1-5, dashed coloured lines) and the calculated VPD trend (black line); (b) Average and standard deviation of R values for each plant (coloured bars) and considering all plants (dark blue bar) performed over 15 days; (c) Scatter plots of the individual plant R and VPD. The scatter plot indicated a high negative correlation between the two variables for plant 1 and 2, and a strong negative correlation for plant 3 and 4 ( $p \leq 0.05$ ), the total correlation coefficient  $\rho$  is also indicated (dark blue bar).

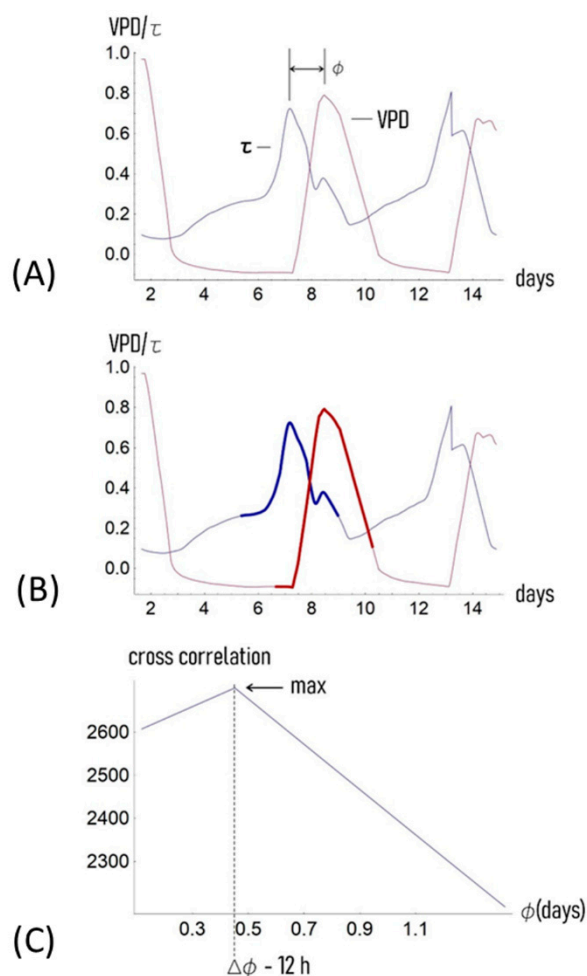

**Figure S3.** The VPD and time constant ( $\tau$ ) functions measured as a function of time (A). Of the originating functions, we isolated the portion of the functions curves around the maximum (B). We then performed the cross correlation between functions, as a function of the arbitrary time lag  $\phi$ : the peak of the cross correlation indicates the lag between functions that, for this configuration, is approximately of 12 h (C).

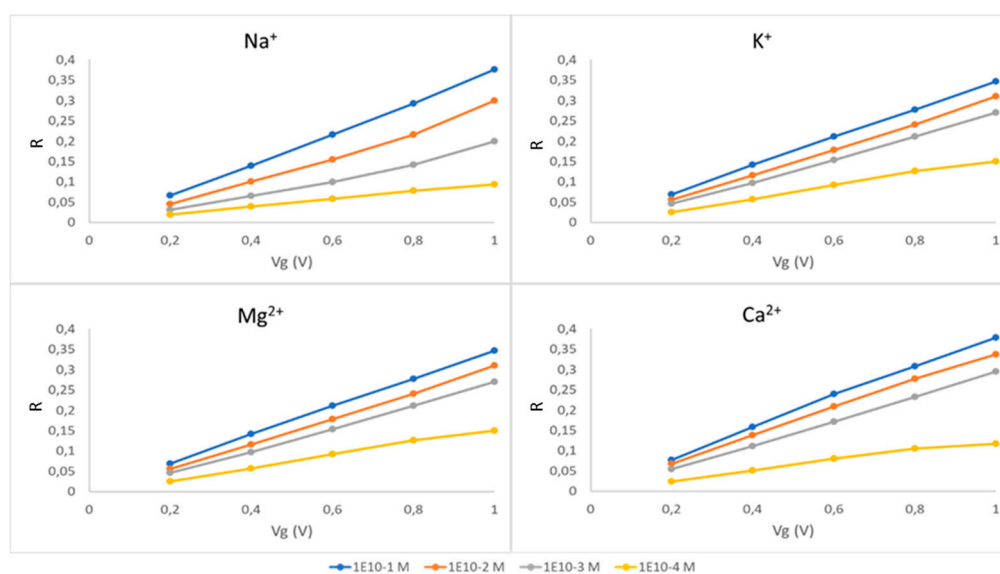

**Figure S4** Transfer characteristics of the R measured using different concentrations of Sodium (Na<sup>+</sup>), Potassium (K<sup>+</sup>), Calcium (Ca<sup>2+</sup>) and Magnesium (Mg<sup>2+</sup>) salts expressed as the sensor response (R), where I is the off current (measured for gate voltages,  $V_g \neq 0$  V) and I<sub>0</sub> is the on current (measured for  $V_g = 0$  V).

**Table S1.** Daily average of Temperature (T), Relative Humidity (RH) and Vapour Pressure Deficit (VPD) for the 15 days of the experiment. VPD was calculated as reported in Materials and Methods.

| Days | T (°C) | RH (%)  | VPD (Kpa) |
|------|--------|---------|-----------|
| 0    | 23,093 | 63,376  | 0,864     |
| 1    | 22,292 | 55,813  | 0,993     |
| 2    | 22,875 | 63,712  | 0,838     |
| 3    | 24,386 | 100,566 | -0,014    |
| 4    | 23,757 | 102,733 | -0,066    |
| 5    | 23,743 | 103,451 | -0,084    |
| 6    | 23,462 | 103,816 | -0,091    |
| 7    | 22,566 | 103,972 | -0,090    |
| 8    | 21,917 | 85,128  | 0,320     |
| 9    | 21,077 | 62,786  | 0,784     |
| 10   | 21,449 | 75,313  | 0,530     |
| 11   | 22,382 | 101,208 | -0,027    |
| 12   | 22,715 | 102,917 | -0,067    |
| 13   | 23,331 | 103,503 | -0,083    |
| 14   | 23,007 | 86,625  | 0,307     |
| 15   | 22,644 | 71,000  | 0,664     |
